# Supplementary material for: Inhibition of corticotropin-releasing hormone receptor 1 and activation of receptor 2 protect against colonic injury and promote epithelium repair
Source: PubMed Central journal article supplement (PMC5425914; doi:10.1038/srep46616), 2017-05-11
Supplement: srep46616-s1.pdf [file srep46616-s1.pdf]

# **Inhibition of corticotropin-releasing hormone receptor 1 and activation of receptor 2 protect against colonic injury and promote epithelium repair**

Bo Li<sup>1,2</sup>, Carol Lee<sup>1,2</sup>, Tali Filler<sup>1,2</sup>, Alison Hock<sup>1,2</sup>, Richard You Wu<sup>3,4</sup>, Qi Li<sup>1,2</sup>, Shigang Chen<sup>1,2</sup>, Yuhki Koike<sup>1,2</sup>, Wan Ip<sup>1,4</sup>, Lijun Chi<sup>1</sup>, Elke Zani-Ruttenstock<sup>1,2</sup>, Pekka Määttänen<sup>5</sup>, Tanja Gonska<sup>1,4,6</sup>, Paul Delgado-Olguin<sup>1,7,8</sup>, Augusto Zani<sup>2,9</sup>, Philip M. Sherman<sup>3,4,10,11</sup>, Agostino Pierro<sup>1,2,12\*</sup>

<sup>1</sup> Physiology and Experimental Medicine Program, The Hospital for Sick Children, Toronto, Ontario, Canada;

<sup>2</sup> Division of General and Thoracic Surgery, The Hospital for Sick Children, Toronto, Ontario, Canada;

<sup>3</sup> Cell Biology Program, The Hospital for Sick Children, Toronto, Ontario, Canada;

<sup>4</sup> Division of Gastroenterology, Hepatology and Nutrition, The Hospital for Sick Children, Toronto, Ontario, Canada;

<sup>5</sup> Biology Department, Burman University, Lacombe, Alberta, Canada;

<sup>6</sup> Department of Paediatrics, University of Toronto, Toronto, Ontario, Canada;

<sup>7</sup> Department of Molecular Genetics, University of Toronto, Toronto, Ontario, Canada;

<sup>8</sup> Heart & Stroke Richard Lewar Centre of Excellence, Toronto, Ontario, Canada;

<sup>9</sup> Developmental and Stem Cell Biology, The Hospital for Sick Children, Toronto, Ontario, Canada;

<sup>10</sup> Department of Laboratory Medicine and Pathobiology, Faculty of Medicine, University of Toronto, Toronto, Ontario, Canada;

<sup>11</sup> Faculty of Dentistry, University of Toronto, Toronto, Ontario, Canada;

<sup>12</sup> Department of Surgery, University of Toronto, Toronto, Ontario, Canada

**Supplementary Table S1: Sequences of primer pairs used for qPCR.**

| Name                                       | Forward Sequence          | Reverse Sequence         |
|--------------------------------------------|---------------------------|--------------------------|
| <i>IL-6</i> <sup>1</sup>                   | CCAATTTCCAATGCTCTCCT      | ACCACAGTGAGGAATGTCCA     |
| <i>TNF<math>\alpha</math></i> <sup>1</sup> | TTCCGAATTCACCTGGAGCCTCGAA | TGCACCTCAGGGAAGAATCTGGAA |
| <i>iNOS</i> <sup>1</sup>                   | CTGCTGGTGGTGACAAGCACATTT  | ATGTCATGAGCAAAGGCGCAGAAC |
| <i>GAPDH</i> <sup>1</sup>                  | TGAAGCAGGCATCTGAGGG       | CGAAGGTGGAAGAGTGGGAG     |
| <i>Lgr5</i> <sup>2</sup>                   | TGCCATCTGCTTACCAGTGTTGT   | ATTCCGTCTTCCCACCACGC     |
| <i>Lyz1</i> <sup>2</sup>                   | GAGACCGAAGCACCGACTATG;    | CGGTTTTGACATTGTGTTCGC    |
| <i>Muc2</i> <sup>2</sup>                   | GAACGGGGCCATGGTCAGCA      | CATAATTGGTCTGCATGCC      |
| <i>IL-22</i> <sup>3</sup>                  | CCCAGTCAGACAGGTTCCA       | TGATCTCTCCACTCTCTCCA     |
| <i>Bacteroidetes</i> <sup>3</sup>          | CRAACAGGATTAGATACCCT      | GGTAAGGTTCCCTCGCGTAT     |
| <i>Firmicutes</i> <sup>3</sup>             | TGAAACTYAAAGGAATTGACG     | ACCATGCACCACCTGTC        |
| <i>Universal</i> <sup>3</sup>              | AAACTCAAAGKAATTGACGG      | CTCACRRCACGAGCTGAC       |

- 1 Li, B. *et al.* Intestinal epithelial injury induced by maternal separation is protected by hydrogen sulfide. *Journal of pediatric surgery* **52**, 40-44 (2017).
- 2 de Groot, R. E. *et al.* Retromer dependent recycling of the Wnt secretion factor Wls is dispensable for stem cell maintenance in the mammalian intestinal epithelium. *PLoS one* **8**, e76971 (2013).
- 3 Grasberger, H. *et al.* Increased Expression of DUOX2 Is an Epithelial Response to Mucosal Dysbiosis Required for Immune Homeostasis in Mouse Intestine. *Gastroenterology* **149**, 1849-1859 (2015).
